# Supplementary material
Source: publisher figshare collection journal article supplement (https://acs.figshare.com/ndownloader/files/25493806)
Supplement: Supplementary file 1 [file 25493806]

Compound,SMILE,HIV-1 (HE) EC50a [µM],HIV-2 (ROD) EC50a [µM],CEM/TK- HIV-2 (ROD) EC50a [µM],cellular toxicity CC50b [µM]
9ax,O=C(C(C)=CN1[C@H]2C=C[C@@H](COP(OP([O-])(OP(OCC3=CC=C(C(CCCCCCCCC)=O)C=C3)(OCC4=CC=C(OC(CCCC)=O)C=C4)=O)=O)([O-])=O)O2)NC1=O.[NH4+].[NH4+],0.37±0.24,1.2±0.92,2.5 ± 1.8,25 ± 3
9by,O=C(C(C)=CN1[C@H]2C=C[C@@H](COP(OP([O-])(OP(OCC3=CC=C(C(CCCCCCCCCCCCCCCCC)=O)C=C3)(OCC4=CC=C(OC(CCCCCC)=O)C=C4)=O)=O)([O-])=O)O2)NC1=O.[NH4+].[NH4+],0.44±0.28,1.1±0.83,0.40±0.15,34 ± 12
9az,O=C(C(C)=CN1[C@H]2C=C[C@@H](COP(OP([O-])(OP(OCC3=CC=C(C(CCCCCCCCC)=O)C=C3)(OCC4=CC=C(OC(CCCCCCCCCCCCCCCCC)=O)C=C4)=O)=O)([O-])=O)O2)NC1=O.[NH4+].[NH4+],0.58±0.32,0.78±0.51,1.1±0.75,35 ± 6
9bz,CCCC[N](CCCC)(CCCC)CCCC.O=C(C(C)=CN1[C@H]2C=C[C@@H](COP(OP([O-])(OP(OCC3=CC=C(C(CCCCCCCCCCCCCCCCC)=O)C=C3)(OCC4=CC=C(OC(CCCCCCCCCCCCCCCCC)=O)C=C4)=O)=O)([O-])=O)O2)NC1=O.[NBu4],0.42±0.18,0.83±0.43,0.38±0.19,28 ± 2
9ay,O=P(OP([O-])(OP(OCC1=CC=C(C(CCCCCCCCC)=O)C=C1)(OCC2=CC=C(OC(CCCCCCCCCCCCCCCCC)=O)C=C2)=O)=O)([O-])OC[C@H]([C@@H](O)[C@H]3O)O[C@H]3N4C(N=CN=C5N)=C5N=C4.[Na+].[Na+],,,,
10a,O=C(C(C)=CN1[C@H]2C=C[C@@H](COP(OP([O-])(OP(OCC3=CC=C(C(CCCCCCCCC)=O)C=C3)(O)=O)=O)([O-])=O)O2)NC1=O.[Na+].[Na+],,,,
10b,O=C(C(C)=CN1[C@H]2C=C[C@@H](COP(OP([O-])(OP(OCC3=CC=C(C(CCCCCCCCCCCCCCCCC)=O)C=C3)(O)=O)=O)([O-])=O)O2)NC1=O.[NH4+].[NH4+],0.33 ± 0.11,0.60 ± 0.00,0.26 ± 0.20,13 ± 1
10c,O=C(C(C)=CN1[C@H]2C[C@H](O)[C@@H](COP(OP([O-])(OP(OCC3=CC=C(C(CCCCCCCCC)=O)C=C3)(O)=O)=O)([O-])=O)O2)NC1=O.[NH4+].[NH4+],6.6 ±1.5,8.8 ± 1.7,> 10,10 ± 1
10d,O=P(OP([O-])(OP(OCC1=CC=C(C(CCCCCCCCC)=O)C=C1)(O)=O)=O)([O-])OC[C@H]([C@@H](O)C2)O[C@H]2N3C(N=CN=C4N)=C4N=C3.[NH4+].[NH4+],10,> 10,> 10,74± 12
11ax,O=C(CCCC)OC1=CC=C([C@@]([Ha])([Hb])OP(N(C(C)C)C(C)C)OCC2=CC=C(C(CCCCCCCCC)=O)C=C2)C=C1,,,,
11by,O=C(CCCCCC)OC1=CC=C([C@@]([Ha])([Hb])OP(N(C(C)C)C(C)C)OCC2=CC=C(C(CCCCCCCCCCCCCCCCC)=O)C=C2)C=C1,,,,
11az,O=C(CCCCCCCCCCCCCCCCC)OC1=CC=C([C@@]([Ha])([Hb])OP(N(C(C)C)C(C)C)OCC2=CC=C(C(CCCCCCCCC)=O)C=C2)C=C1,,,,
11bz,O=C(CCCCCCCCCCCCCCCCC)OC1=CC=C([C@@]([Ha])([Hb])OP(N(C(C)C)C(C)C)OCC2=CC=C(C(CCCCCCCCCCCCCCCCC)=O)C=C2)C=C1,,,,
12X,CC(C)N(C(C)C)P(OCC1=CC=C(OC(CCCC)=O)C=C1)N(C(C)C)C(C)C,,,,
12y,CC(C)N(C(C)C)P(OCC1=CC=C(OC(CCCCCC)=O)C=C1)N(C(C)C)C(C)C,,,,
12z,CC(C)N(C(C)C)P(OCC1=CC=C(OC(CCCCCCCCCCCCCCCCC)=O)C=C1)N(C(C)C)C(C)C,,,,
13a,O=C(CCCCCCCCC)C1=CC=C(CO)C=C1,,,,
13b,O=C(C1=CC=C(CO)C=C1)CCCCCCCCCCCCCCCCC,,,,
14a,O=C(CCCCCCCCC)N(OC)C,,,,
14b,O=C(CCCCCCCCCCCCCCCCC)N(OC)C,,,,
17a,CC(C)N(C(C)C)P(OCC1=CC=C(C(CCCCCCCCC)=O)C=C1)OCC2C(C=CC=C3)=C3C4=C2C=CC=C4,,,,
17b,CC(C)N(C(C)C)P(OCC1=CC=C(C(CCCCCCCCCCCCCCCCC)=O)C=C1)OCC2C(C=CC=C3)=C3C4=C2C=CC=C4,,,,
